# Supplementary material for: Allium sativum@AgNPs and Phyllanthus urinaria@AgNPs: a comparative analysis for antibacterial application
Source: PubMed Central journal article supplement — RSC Adv. 2022 Dec 14;12(55):35730–43. doi: 10.1039/d2ra06847h (PMC9748653; doi:10.1039/d2ra06847h), 2022-12-14
Supplement: RA-012-D2RA06847H-s001.pdf [file RA-012-D2RA06847H-s001.pdf]

## Supporting Information

**Table S1.** FTIR typical peaks of functional groups of Alginate, CMC, and Alginate/CMC carrier

| Functional group                     | Wavelength ( $\text{cm}^{-1}$ ) |      |                      |
|--------------------------------------|---------------------------------|------|----------------------|
|                                      | Alginate                        | CMC  | Alginate/CMC carrier |
| Si-O symmetric stretching            |                                 |      | 659                  |
| antisymmetric C-O-C stretch          | 1014                            | 1080 | 1018                 |
| -C-O stretching                      |                                 | 1340 | 1323                 |
| -COO- symmetric stretching vibration |                                 | 1440 | 1413                 |
| N-H bending                          |                                 |      | 1588 and 600         |
| -C=O ester stretch                   | 1631                            | 1650 |                      |
| C-H ( $\text{sp}^3$ )                | 2923                            | 2940 | 2909                 |
| -OH group in the trans-isomer        |                                 |      | 3303                 |
| -OH stretch                          | 3421                            | 3470 |                      |

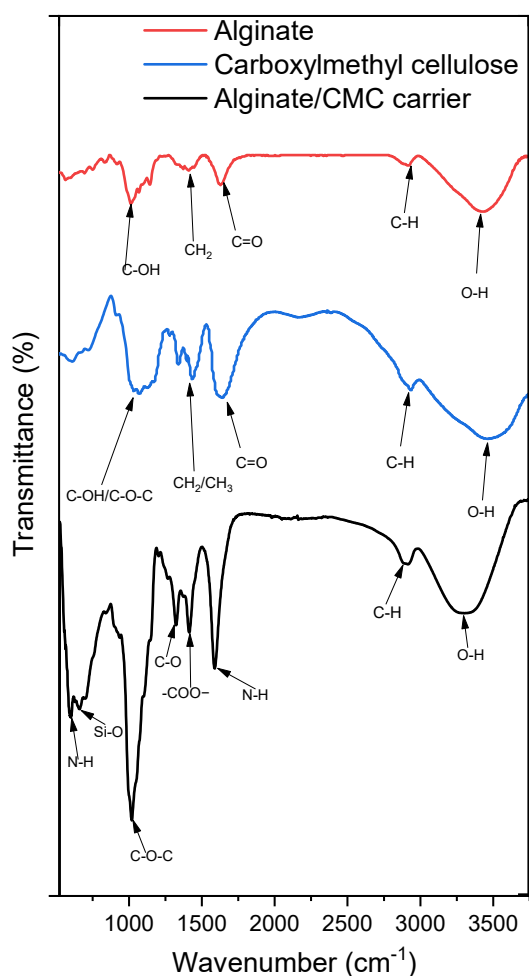

**Figure S1.** FTIR spectra of Alginate, CMC and Alginate/CMC carrier

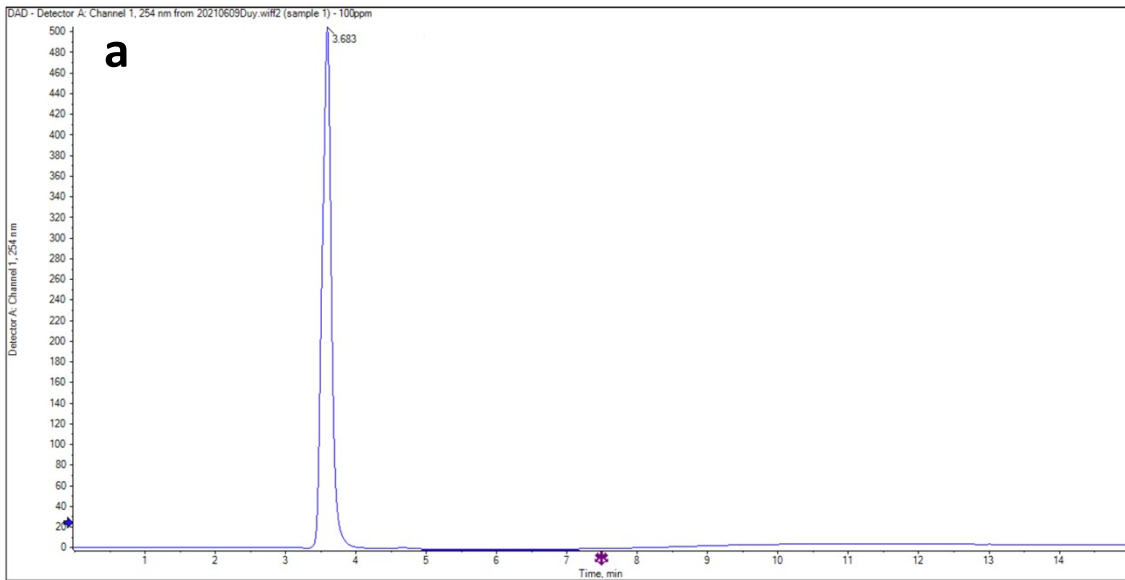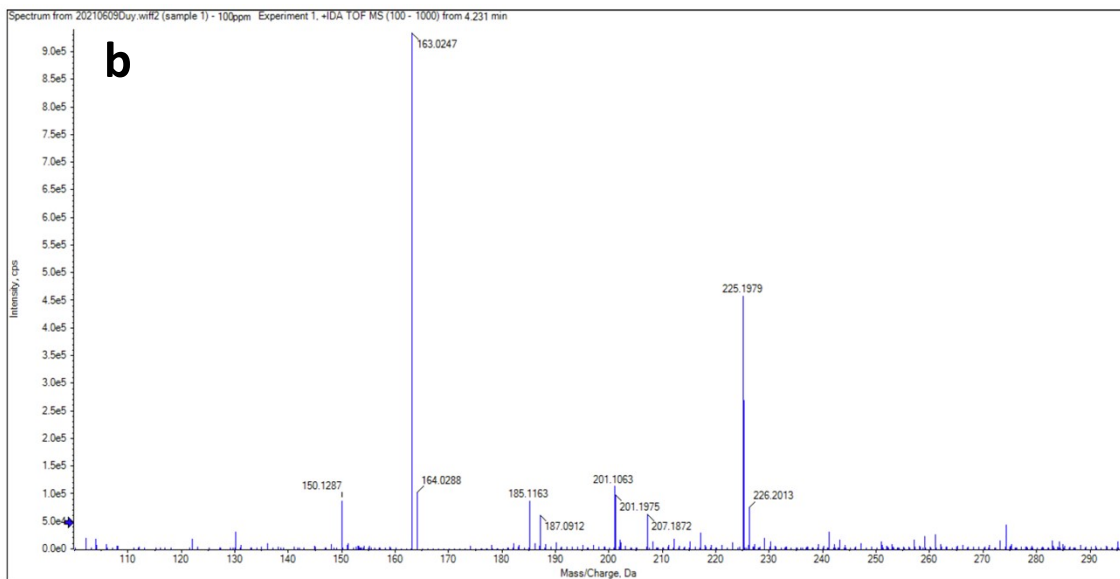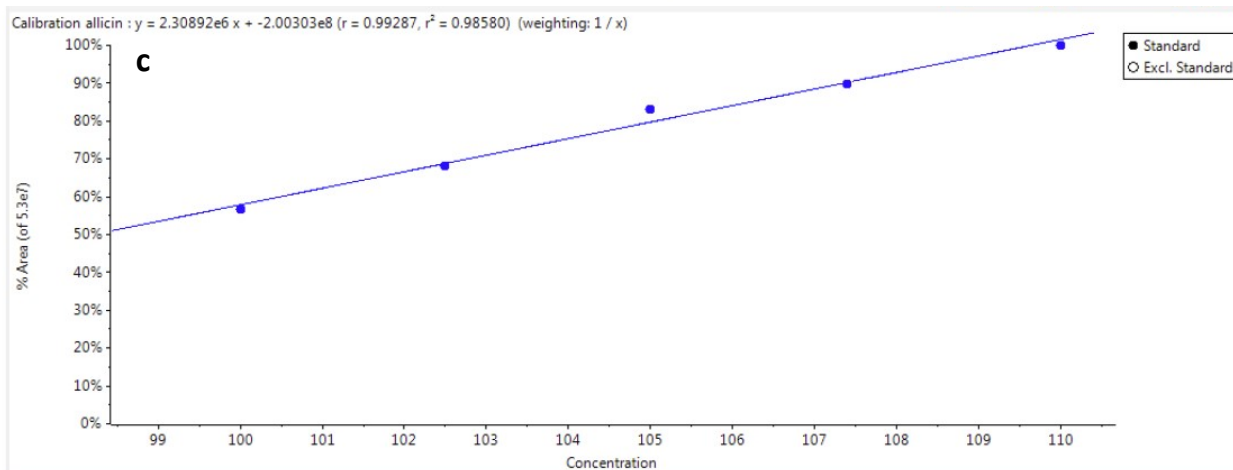

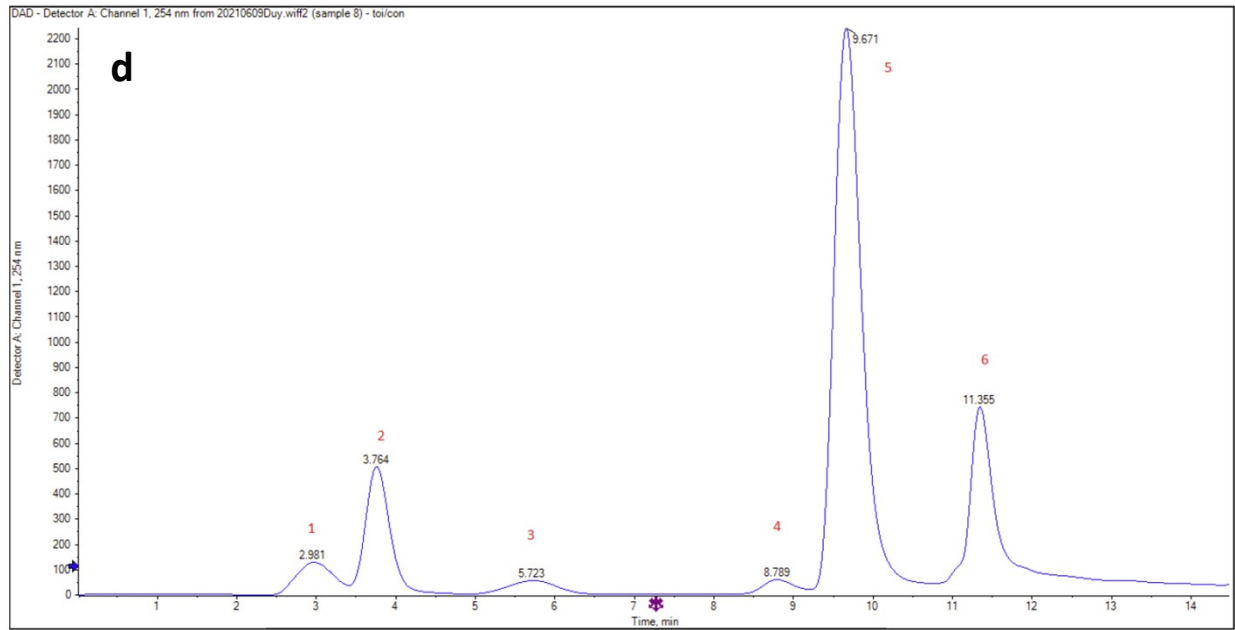

**Figure S2.** (a) Chromatogram (Retention time of 3.683), (b) Mass Spectral Profile, (c) Calibration curve of standard allicin, and (d) Chromatogram of ethanolic extracts of *Allium sativum* (Allicin at 3.764)

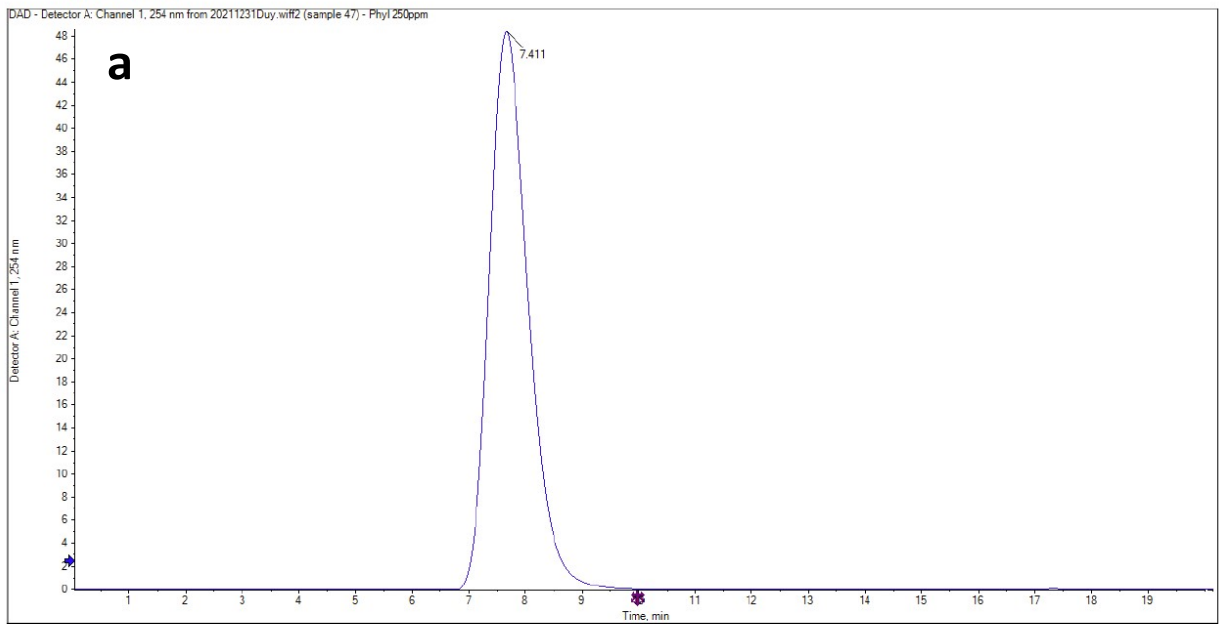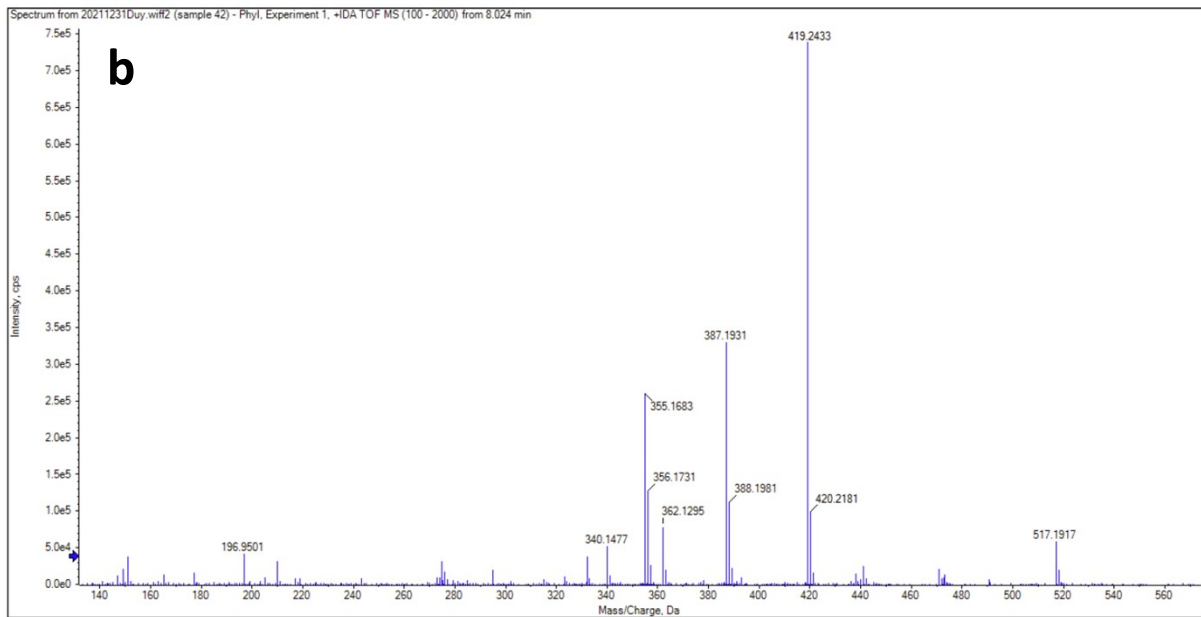

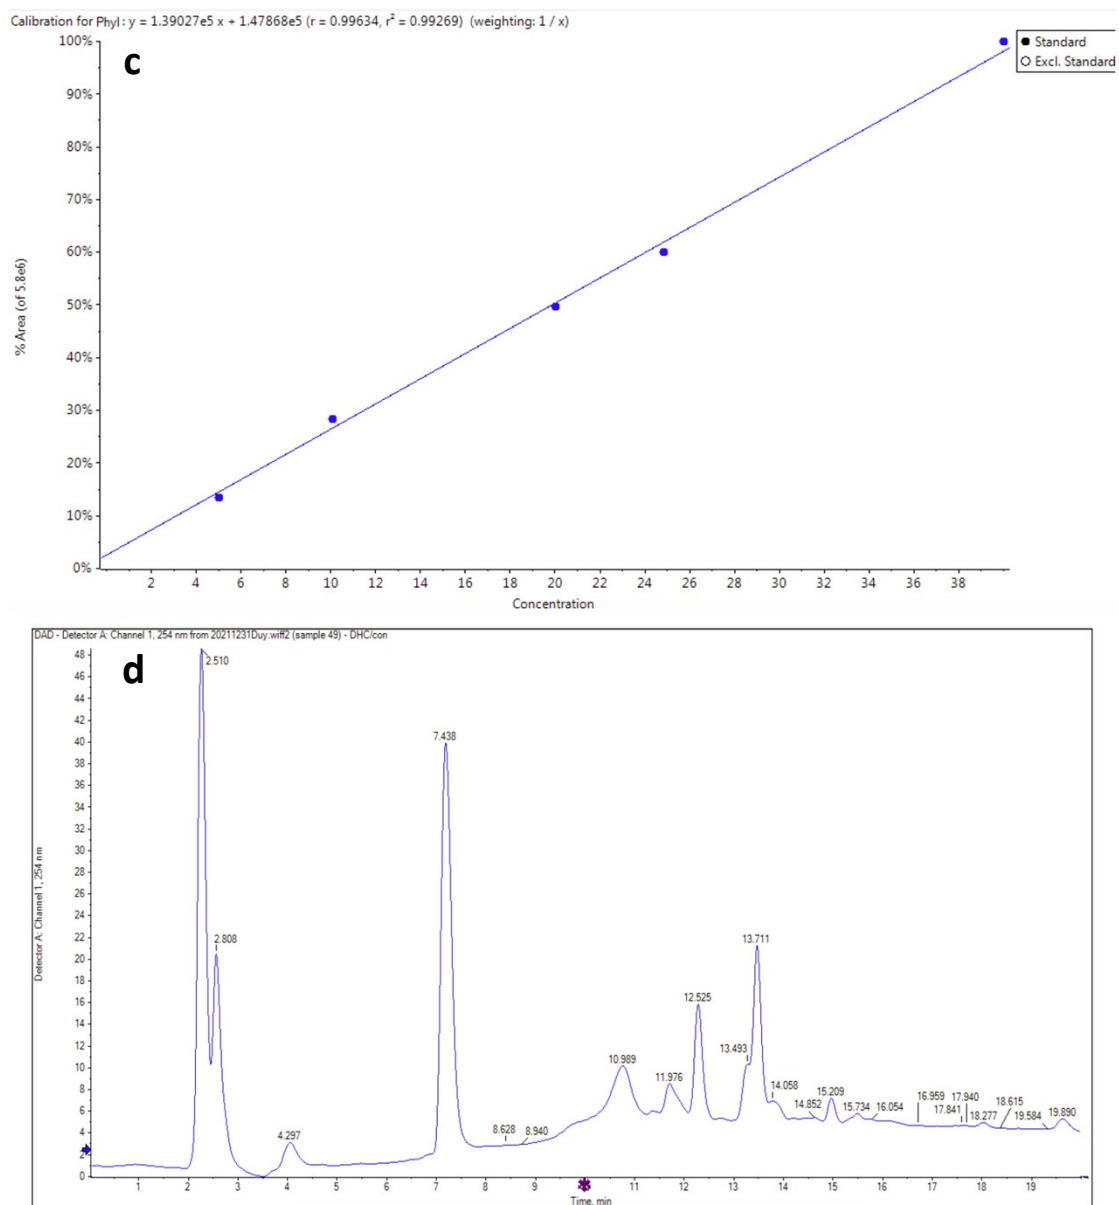

**Figure S3.** (a) Chromatogram (Retention time of 7.411), (b) Mass Spectral Profile, (c) Calibration curve of standard Phyllanthin, and (d) Chromatogram of ethanolic extracts of *Phyllanthus urinaria* (Phyllanthin at 7.438)

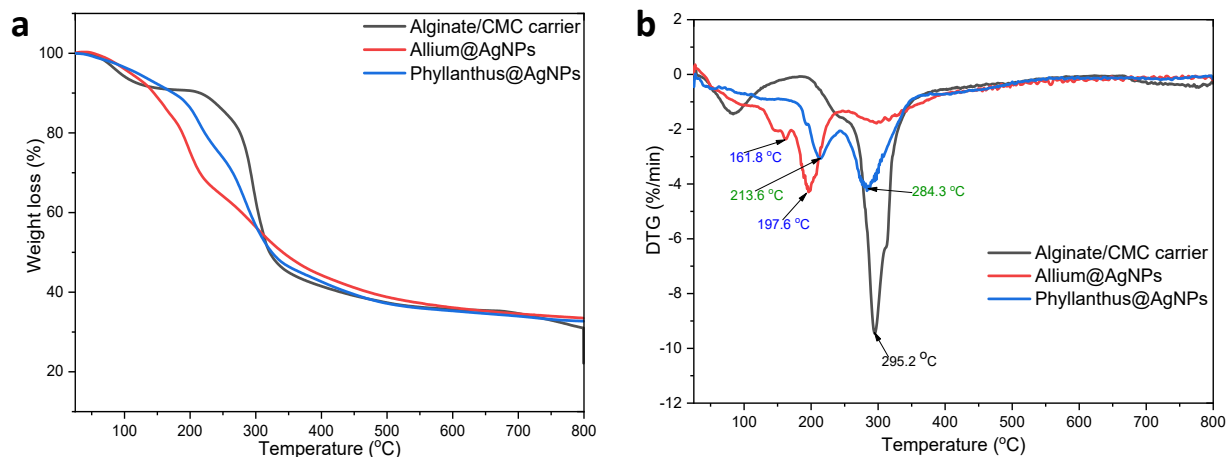

**Figure S4.** (a) Thermal gravimetrical analysis (TGA) and (b) Differential thermal analysis (DTA) profiles of Alginate/CMC carrier, Allium@AgNPs and Phyllanthus@AgNPs

**Table S2.** Weight loss steps of the samples

| Sample               | Water detachment |                 | Decomposition of biomolecules in the extracts |               |                 | Decomposition and carbonization of polymers |               |                 | % ash/ total dried weight | % extract/ total dried weight |
|----------------------|------------------|-----------------|-----------------------------------------------|---------------|-----------------|---------------------------------------------|---------------|-----------------|---------------------------|-------------------------------|
|                      | Temp. range (°C) | Weight loss (%) | Temp. range (°C)                              | DTG peak (°C) | Weight loss (%) | Temp. range (°C)                            | DTG peak (°C) | Weight loss (%) |                           |                               |
|                      |                  | (a)             |                                               |               | (b)             |                                             |               | (c)             |                           |                               |
| Alginate/CMC carrier | 80-120           | 8.6             |                                               |               |                 | 200-800                                     | 295.2         | 60.39           | 43.34                     |                               |
| Allium@Ag NPs        | 80-120           | 7.42            | 150-230                                       | 197.6         | 26.95           | 230-800                                     | 204.1         | 32.22           | 44.10                     | 29.11                         |
| Phyllanthus@Ag NPs   | 80-120           | 8.62            | 150-240                                       | 213.6         | 16              | 240-800                                     | 284.3         | 42.61           | 45.29                     | 17.51                         |

\* (d) =  $(100 - (a) - (b) - (c)) / (100 - (a))$

\*\* (e) =  $(b) / (100 - (a))$
